# Supplementary material
Source: HighWire-hosted journal article supplement (http://www.ajnr.org/highwire/filestream/52840/field_highwire_adjunct_files/0/16-00225.pdf)
Supplement: 16-00225.pdf [file 16-00225.pdf]

**On-line Table 1: Characteristics of pregnancy and MRI data of patients who underwent TOP**

| Case No./Cyst | Parental History                                                                                                       | MRI Findings                                                                                                                                      |                                                                                                                                 |                                                                                | Postmortem MRI and Examination                                                                                                                                                                                                                                 |
|---------------|------------------------------------------------------------------------------------------------------------------------|---------------------------------------------------------------------------------------------------------------------------------------------------|---------------------------------------------------------------------------------------------------------------------------------|--------------------------------------------------------------------------------|----------------------------------------------------------------------------------------------------------------------------------------------------------------------------------------------------------------------------------------------------------------|
|               |                                                                                                                        | GA (wk), PVPC (Uni-/Bilaterality, Uni-/Multilocularity, AP Diameter, Height, Typicality, Location)                                                | Additional Findings                                                                                                             | Indication for TOP                                                             |                                                                                                                                                                                                                                                                |
| 21            | Prior spontaneous abortion<br>Prior TOP due to increased fetal NT and cerebellar agenesis                              | 35, Bilateral, multilocular, 12 × 6.5 mm, typical, adjacent to the frontal horns, anterior to the caudothalamic notch                             | Dilated temporal horns, porencephalic cyst<br>Additional cyst in the trigon                                                     | Porencephalic cyst                                                             | MRI: ventricular border could not be identified due to ventricular collapse<br>Postmortem: irregular cystic lesions parallel to the ventricles; PVPC in the right temporal horn; missing ependymal, replaced with gliosis in the left occipital horn           |
| 22            | —                                                                                                                      | 35, Bilateral, multilocular, 10 × 6 mm, typical, adjacent to the frontal horns, anterior to the caudothalamic notch                               | Asymmetric and moderately dilated lateral ventricles<br>T2 hyperintense signal in the white matter and irregular temporal horns | Suspected fetal ventriculitis                                                  | MRI: bilateral PVPC adjacent to the frontal horns, smaller than demonstrated in the uterus<br>Postmortem: bilateral PVPC associated with edema, gliosis, and increased microglia<br>No postmortem due to fetal reduction                                       |
| 23            | 2 Prior spontaneous abortions<br>Maternal and fetal CMV infection during pregnancy<br>Twin pregnancy, fetal reduction  | 29, Bilateral, multilocular, 3.5 × 4 mm, atypical, adjacent to the frontal horns, anterior to the caudothalamic notch                             | —                                                                                                                               | Fetal CMV infection                                                            |                                                                                                                                                                                                                                                                |
| 24            | Subependymal pseudocysts<br>Daughter with developmental delay, congenital cataract, nystagmus, hypotonia, and seizures | 31, Bilateral, multilocular, 10.3 × 6.5 mm, typical, adjacent to the frontal horns, anterior to the caudothalamic notch                           | Mildly dilated lateral ventricles; small porencephalic lesion in the right frontal horn, attached to the lateral ventricle      | Porencephalic cyst                                                             | MRI: dilated right lateral ventricle with adjacent porencephalic cyst and hypointense signal in T2 series compatible with hemorrhage<br>Postmortem: white matter necrosis in the right fronto-parietal lobe with porencephalic cyst<br>TOP in another hospital |
| 25            | Mother, Kallmann syndrome<br>Maternal and fetal CMV infection during pregnancy                                         | 33, Bilateral, multilocular, 10.5 × 6 mm, typical, adjacent to the frontal and occipital horns, anterior and posterior to the caudothalamic notch | Asymmetric lateral ventricles<br>T2 hyperintense signal in the white matter in both hemispheres                                 | Fetal CMV infection                                                            |                                                                                                                                                                                                                                                                |
| 26            | Polyhydramnios                                                                                                         | 29, Bilateral, multilocular, 6.6 × 4.8 mm, typical, adjacent to the frontal horns, anterior and posterior to the caudothalamic notch              | Evidence for bilateral germinal matrix hemorrhage<br>Mildly dilated lateral ventricles                                          | PVPC with additional dilated lateral ventricles and germinal matrix hemorrhage | TOP in another hospital                                                                                                                                                                                                                                        |

**Note:**—NT indicates nuchal translucency; AP, anteroposterior; GA, gestational age.

**On-line Table 2: Characteristics of pregnancy, MRI data, and neurodevelopmental outcome of children with isolated PVPC (group A)**

| Case No./Cyst                   | Parental History                                                                                                                                                                                                                                              | MRI Findings, GA at Time of MRI (wk), PVPC (Uni-/Bilaterality, Uni-/Multilocularity, AP Diameter, Height, Typicality, Location) | Neurodevelopmental Outcome (Age)                                                                                                                                                                           |
|---------------------------------|---------------------------------------------------------------------------------------------------------------------------------------------------------------------------------------------------------------------------------------------------------------|---------------------------------------------------------------------------------------------------------------------------------|------------------------------------------------------------------------------------------------------------------------------------------------------------------------------------------------------------|
| <b>Connatal cysts</b>           |                                                                                                                                                                                                                                                               |                                                                                                                                 |                                                                                                                                                                                                            |
| 1                               | Prior child with choroid plexus cysts                                                                                                                                                                                                                         | 34, Bilateral, multilocular, 8.5 × 6 mm, typical, adjacent to the frontal horns, anterior to the caudothalamic notch            | Adequate adaptive level according to Vineland II (3 yr 8 mo)                                                                                                                                               |
| 2                               | Antiplatelet therapy during pregnancy; heterozygote to <i>MTHFR</i> and <i>FVL</i> mutations<br>Prior TOP due to PVPC finding<br>Prior pregnancy with PET                                                                                                     | 33, Bilateral, multilocular, 7.5 × 5.8 mm, typical, adjacent to the frontal horns, anterior to the caudothalamic notch          | Clinical follow-up: normal development with mild hypertonía (10 mo); adequate adaptive level according to Vineland II (3 yr 6 mo)                                                                          |
| 3                               |                                                                                                                                                                                                                                                               | 33, Bilateral, multilocular, 14.5 × 7 mm, typical, adjacent to the frontal horns, anterior to the caudothalamic notch           | Clinical follow-up: normal findings (9 mo)<br>Adequate adaptive level according to Vineland II (2 yr 4 mo)                                                                                                 |
| 4                               | APLA syndrome, heterozygote to factor 2 mutation<br>Prior child with cerebral palsy<br>Prior TOP due to multiple fetal malformations<br>Maternal CMV infection during pregnancy (negative serology in amniocentesis)<br>Twin pregnancy, TTTS, fetal reduction | 33, Bilateral, multilocular, 6 × 4.5 mm, typical, adjacent to the frontal horns, anterior to the caudothalamic notch            | Urine test negative for CMV after birth<br>Clinical follow-up: mild hypotonía (3 mo), normal examination findings without hypotonía (6 mo)<br>Adequate adaptive level according to Vineland II (1 yr 3 mo) |
| 5                               |                                                                                                                                                                                                                                                               | 32, Bilateral, multilocular, 7 × 5 mm, typical, adjacent to the frontal horns, anterior to the caudothalamic notch              | Clinical follow-up: torticollis and hypotonía (3 mo), normal findings (6 mo)<br>Adequate adaptive level according to Vineland II (1 yr 1 mo)                                                               |
| 6                               | Homozygote to <i>MTHFR</i> mutation, heterozygote to <i>FVL</i> mutation, low C protein levels<br>Antiplatelet and antipsychotic treatment during pregnancy<br>Prior pregnancy with PET                                                                       | 33, Bilateral, multilocular, 8.7 × 5.5 mm, typical, adjacent to the frontal horns, anterior to the caudothalamic notch          | Adequate adaptive level according to Vineland II (1 yr 1 mo)                                                                                                                                               |
| <b>Subependymal pseudocysts</b> |                                                                                                                                                                                                                                                               |                                                                                                                                 |                                                                                                                                                                                                            |
| 7                               | Maternal toxoplasma infection during pregnancy (no amniocentesis)                                                                                                                                                                                             | 34, unilateral (right), unilocular, 11.5 × 5.7 mm, typical, adjacent to the frontal horns, anterior to the caudothalamic notch  | Adequate adaptive level according to Vineland II (1 yr 6 mo)                                                                                                                                               |
| 8                               | Mother, hypothyroidism<br>Two prior spontaneous abortions<br>Prior child with DENT disease and <i>CLCN5</i> mutation<br>Prior child who died at the 14 mo of age from pneumonia<br>Polyhydramnios                                                             | 31, Bilateral, multilocular, 8.5 × 6.5 mm, typical, adjacent to the frontal horns, anterior to the caudothalamic notch          | Negative saliva test for CMV after birth<br>Clinical follow-up: healthy (3, 9, 12 mo)<br>Adequate adaptive level according to Vineland II (1 yr)                                                           |

**Note:**—TTTS indicates twin-to-twin transfusion syndrome; PET, pre-eclamptic toxemia; APLA, antiphospholipid antibody AP, anteroposterior; GA, gestational age.

**On-line Table 3: Characteristics of pregnancy, MRI data, and neurodevelopmental outcome of children with nonisolated PVPC and normal outcome**

| Case No./Cyst | Parental History                                                                                                                                                 | MRI Findings                                                                                                                         |                                                                                                                                                                                             |                                                                                                                                                    | Neurodevelopmental Outcome (Age) |
|---------------|------------------------------------------------------------------------------------------------------------------------------------------------------------------|--------------------------------------------------------------------------------------------------------------------------------------|---------------------------------------------------------------------------------------------------------------------------------------------------------------------------------------------|----------------------------------------------------------------------------------------------------------------------------------------------------|----------------------------------|
|               |                                                                                                                                                                  | GA (wk), PVPC (Uni-/Bilaterality, Uni-/Multilocularity, AP Diameter, Height, Typicality, Location)                                   | Additional Findings                                                                                                                                                                         |                                                                                                                                                    |                                  |
| 9             | —                                                                                                                                                                | 35, Bilateral, unilocular, 8.5 × 3.3 mm, typical, adjacent to the frontal horns, anterior to the caudothalamic notch                 | Asymmetric and moderately dilated lateral ventricles                                                                                                                                        | Adequate adaptive level according to Vineland II (2 yr 11 mo)                                                                                      |                                  |
| 10            | Father, CSP1 deficiency<br>Prior spontaneous abortion                                                                                                            | 35, Bilateral, multilocular, 11 × 5.2 mm, typical, adjacent to the frontal horns, anterior to the caudothalamic notch                | Asymmetric lateral ventricles                                                                                                                                                               | Clinical follow-up at 3, 6, 9 mo, 1 yr, 1 yr 3 mo: at 3 mo, mild developmental delay, hypotonia, and torticollis; at 1 yr 3 mo, normal development |                                  |
| 11            | Prior spontaneous abortion<br>Maternal family, spina bifida, familial dysautonomia<br>Paternal family, mental retardation<br>SSRI treatment during pregnancy     | 31, Bilateral, multilocular, 6 × 4.6 mm, typical, adjacent to the frontal horns, anterior to the caudothalamic notch                 | Asymmetric and mildly dilated lateral ventricle                                                                                                                                             | Moderately high adaptive level according to Vineland II (2 yr 6 mo)<br>Moderately high adaptive level according to Vineland II (2 yr 4 mo)         |                                  |
| 12            | SSRI treatment during pregnancy<br>IUGR                                                                                                                          | 37, Bilateral, multilocular, 6.2 × 3.7 mm, typical, adjacent to the frontal horns, anterior to the caudothalamic notch               | —                                                                                                                                                                                           | Moderately high adaptive level according to Vineland II (1 yr 9 mo)                                                                                |                                  |
| 13            | PVPC in prior pregnancy                                                                                                                                          | 32, Bilateral, multilocular, 8 × 5.5 mm, typical, adjacent to the frontal horns, anterior to the caudothalamic notch                 | Asymmetric lateral ventricles                                                                                                                                                               | Clinical follow-up: healthy (9 mo)<br>Adequate adaptive level according to Vineland II (1 yr 6 mo)                                                 |                                  |
| 14            | IUGR                                                                                                                                                             | 37, Bilateral, multilocular, 10.5 × 5 mm, typical, adjacent to the frontal horns, anterior to the caudothalamic notch                | Asymmetric lateral ventricles; suspected T2 hyperintense signal in the white matter                                                                                                         | Clinical follow-up: healthy (9 mo)<br>Adequate adaptive level according to Vineland II (1 yr 5 mo)                                                 |                                  |
| 15            | Subependymal pseudocysts<br>Antiplatelet treatment due to a TIA during pregnancy<br>Maternal CMV infection during pregnancy (negative serology in amniocentesis) | 34, Unilateral (left), multilocular, 8.5 × 5.5 mm, typical, adjacent to the frontal horns, anterior to the caudothalamic notch       | T2 hyperintense signal in the white matter                                                                                                                                                  | Clinical follow-up: healthy (3 mo)<br>Adequate adaptive level according to Vineland II (2 yr 4 mo)                                                 |                                  |
| 16            | Father, myotonic dystrophy<br>Prior child with white matter disease, died at 4 yr<br>IUGR                                                                        | 36, Bilateral, multilocular, 13 × 5.5 mm, typical, adjacent to the frontal horns, anterior to the caudothalamic notch                | T2 hyperintense signal in the white matter lobes                                                                                                                                            | Adequate adaptive level according to Vineland II (3 yr 8 mo)                                                                                       |                                  |
| 17            | Prior spontaneous abortion                                                                                                                                       | 38, Bilateral, multilocular, 8.5 × 6 mm, typical, adjacent to the frontal horns, anterior to the caudothalamic notch                 | Asymmetric and moderately dilated lateral ventricles, dolichocephalic skull                                                                                                                 | Moderately high adaptive level according to Vineland II (2 yr 6 mo)                                                                                |                                  |
| 18            | Antiepileptic treatment during pregnancy<br>Maternal family, mental retardation<br>Paternal family, epilepsy                                                     | 38, Bilateral, multilocular, 7.2 × 5.2 mm, typical, adjacent to the frontal horns, anterior and posterior to the caudothalamic notch | Dilated temporal horns; T2 hyperintense signal in the white matter; asymmetric and mildly dilated lateral ventricles; rotation of the vermis without a correct closure of the 4th ventricle | Saliva test negative for CMV after birth<br>Clinical follow-up: healthy (2, 5 mo)<br>Adequate adaptive level according to Vineland II (1 yr 2 mo)  |                                  |

**Note:**—SSRI indicates selective serotonin reuptake inhibitor; AP, anteroposterior; GA, gestational age.

**On-line Table 4: Characteristics of pregnancy, MRI data, and neurodevelopmental outcome of children with nonisolated PVPC and abnormal outcome**

| Case No./Cyst                  | Parental History           | MRI Findings                                                                                                                         |                                                                                                                            |                                                                                                           | Fetal Abnormalities                                                                                                | Neurodevelopmental Outcome (Age) |
|--------------------------------|----------------------------|--------------------------------------------------------------------------------------------------------------------------------------|----------------------------------------------------------------------------------------------------------------------------|-----------------------------------------------------------------------------------------------------------|--------------------------------------------------------------------------------------------------------------------|----------------------------------|
|                                |                            | GA (wk), PVPC (Uni-/Bilaterality, AP Diameter, Height, Typicality, Location)                                                         | Additional Findings                                                                                                        |                                                                                                           |                                                                                                                    |                                  |
| Subependymal pseudocysts<br>19 | —                          | 29, Bilateral, multilocular, 6.5 × 4.5 mm, typical, adjacent to the frontal horns, anterior and posterior to the caudothalamic notch | Asymmetric and moderately dilated lateral ventricles; T2 hyperintense signal in the white matter and sulcation abnormality | 1P36 microdeletion                                                                                        | Developmental delay, vision problems and seizures<br>Low adaptive level according to Vineland II (2 yr 2 mo)       |                                  |
| 20                             | Prior spontaneous abortion | 32, Bilateral, multilocular, 7.6 × 5.6 mm, typical, adjacent to the frontal horns, anterior to the caudothalamic notch               | Cerebellum measurement (TCD) <3rd percentile without abnormality in its structure; abnormal structure of the 4th ventricle | IUGR<br>Abnormal echo test findings, VSD and suspected AV canal<br>Translocation in chromosomes 11 and 22 | Low adaptive level according to Vineland II (1 yr 9 mo)<br>Developmental delay; Emanuel syndrome (OMIM No. 609029) |                                  |

**Note:**—YSD indicates ventricular septal defect; AV, atrioventricular; TCD, transverse cerebellar diameter; OMIM, Online Mendelian Inheritance in Man; AP, anteroposterior; GA, gestational age.

**On-line Table 5: Vineland II adaptive behavior composite standard scores**

| Group/Case No. | Age        | Adaptive Behavior Composite Standard Score | Adaptive Level  | Percentile Rank |
|----------------|------------|--------------------------------------------|-----------------|-----------------|
| A              |            |                                            |                 |                 |
| 1              | 3 yr 8 mo  | 102                                        | Adequate        | 55              |
| 2              | 3 yr 6 mo  | 114                                        | Adequate        | 82              |
| 3              | 2 yr 4 mo  | 102                                        | Adequate        | 55              |
| 4              | 1 yr 3 mo  | 100                                        | Adequate        | 50              |
| 5              | 1 yr 1 mo  | 106                                        | Adequate        | 66              |
| 6              | 1 yr 1 mo  | 105                                        | Adequate        | 63              |
| 7              | 1 yr 6 mo  | 98                                         | Adequate        | 45              |
| 8              | 1 yr       | 95                                         | Adequate        | 37              |
| B              |            |                                            |                 |                 |
| 9              | 2 yr 11 mo | 100                                        | Adequate        | 50              |
| 10             | 2 yr 6 mo  | 121                                        | Moderately high | 92              |
| 11             | 2 yr 4 mo  | 122                                        | Moderately high | 93              |
| 12             | 1 yr 9 mo  | 115                                        | Moderately high | 84              |
| 13             | 1 yr 6 mo  | 105                                        | Adequate        | 63              |
| 14             | 1 yr 5 mo  | 108                                        | Adequate        | 70              |
| 15             | 2 yr 4 mo  | 98                                         | Adequate        | 45              |
| 16             | 3 yr 8 mo  | 103                                        | Adequate        | 58              |
| 17             | 2 yr 6 mo  | 116                                        | Moderately high | 86              |
| 18             | 1 yr 2 mo  | 98                                         | Adequate        | 45              |
| 19             | 2 yr 2 mo  | 58                                         | Low             | <1              |
| 20             | 1 yr 9 mo  | 63                                         | Low             | 1               |
